CORRECTION

# Correction: Auxin Influx Carriers Control Vascular Patterning and Xylem Differentiation in *Arabidopsis thaliana*

The *PLOS Genetics* Staff

## Notice of Republication

This article was republished on May 15, 2015, to correct Supporting Information files: S1, S5, S6, S8, S9, S10, S11 and S16 Figs, which were incorrectly published with a pink background. The publisher apologizes for the errors. Please download these files again to view the correct versions. The originally published, uncorrected files and the republished, corrected files are provided here for reference.

## Supporting Information

**S1 File. Originally published, uncorrected supporting information files.**

(ZIP)

**S2 File. Republished corrected supporting information files**

(ZIP)

## Reference

1. Fàbregas N, Formosa-Jordan P, Confraria A, Siligato R, Alonso JM, Swarup R, et al. (2015) Auxin Influx Carriers Control Vascular Patterning and Xylem Differentiation in *Arabidopsis thaliana*. *PLoS Genet* 11(4): e1005183. doi: [10.1371/journal.pgen.1005183](https://doi.org/10.1371/journal.pgen.1005183) PMID: [25922946](https://pubmed.ncbi.nlm.nih.gov/25922946/)

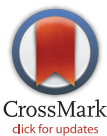

## OPEN ACCESS

**Citation:** The *PLOS Genetics* Staff (2015) Correction: Auxin Influx Carriers Control Vascular Patterning and Xylem Differentiation in *Arabidopsis thaliana*. *PLoS Genet* 11(6): e1005296. doi:10.1371/journal.pgen.1005296

**Published:** June 17, 2015

**Copyright:** © 2015 The PLOS Genetics Staff. This is an open access article distributed under the terms of the [Creative Commons Attribution License](https://creativecommons.org/licenses/by/4.0/), which permits unrestricted use, distribution, and reproduction in any medium, provided the original author and source are credited.
